# Supplementary material for: In situ environmental transmission electron microscopy study of oxidation of two-dimensional Ti3C2and formation of carbon-supported TiO2
Source: Royal Society of Chemistry journal article supplement (doi:10.1039/c4ta02583k), 2014-07-08
Supplement: c4ta02583k1.pdf [file c4ta02583k1.pdf]

## Supporting Information

### ***In Situ* Environmental Transmission Electron Microscopy Study of Oxidation of Two-Dimensional $Ti_3C_2$ and Formation of Carbon-Supported $TiO_2$**

H. Ghassemi, W. Harlow, O. Mashtalir, M. Beidaghi, M. R. Lukatskaya, Y. Gogotsi, and M. L. Taheri\*

*Department of Materials Science and Engineering and A.J. Drexel Nanomaterials Institute, Drexel University, Philadelphia, PA 19104, USA*

#### **Scanning Electron Microscopy and Energy-Dispersive Spectroscopy**

Energy-dispersive spectroscopies (EDS) of the flash heated and slow heated samples were obtained using Zeiss Supra 50VP.

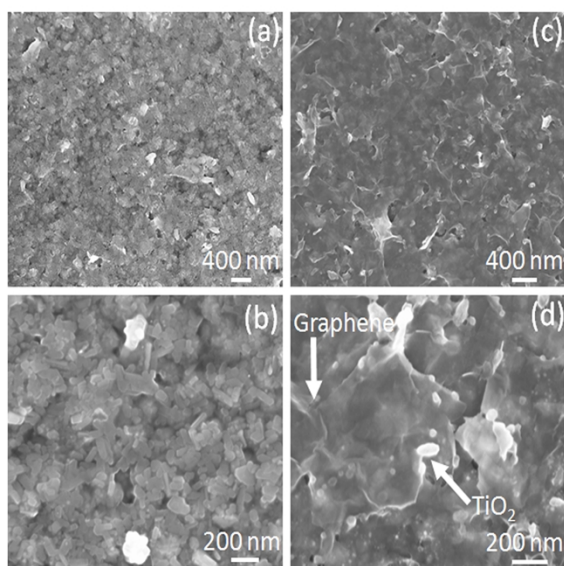

**Figure S1** Scanning electron microscopy images of the samples produced by slow heating (a)-(b) and flash heated (c)-(d) oxidation of  $Ti_3C_2T_x$  taken at different magnifications.

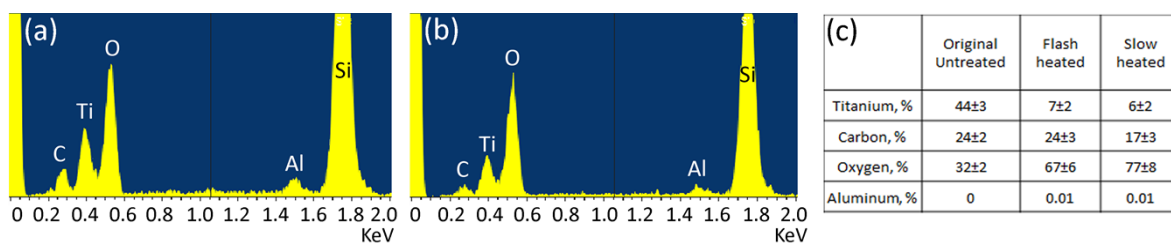

**Figure S2** Energy dispersive spectra representing the elemental compositions of oxidized samples. (a) Flash oxidized sample shows a high oxygen content, which indicates formation of  $\text{TiO}_2$ , while a lower carbon content in the slowly heated sample (b) revealed oxidation/burning of carbon in the pristine sample.
